# Supplementary material for: Knee Joint Distraction as Treatment for Osteoarthritis Results in Clinical and Structural Benefit: A Systematic Review and Meta-Analysis of the Limited Number of Studies and Patients Available
Source: PubMed Central journal article supplement — Cartilage. 2020 Jul 22;13(1 Suppl):1113S–1123S. doi: 10.1177/1947603520942945 (PMC8808886; doi:10.1177/1947603520942945), 2020-07-22
Supplement: PRISMA_2009_flow_diagram.pdf [file PRISMA_2009_flow_diagram.pdf]

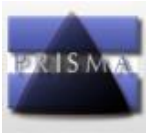

## PRISMA 2009 Flow Diagram

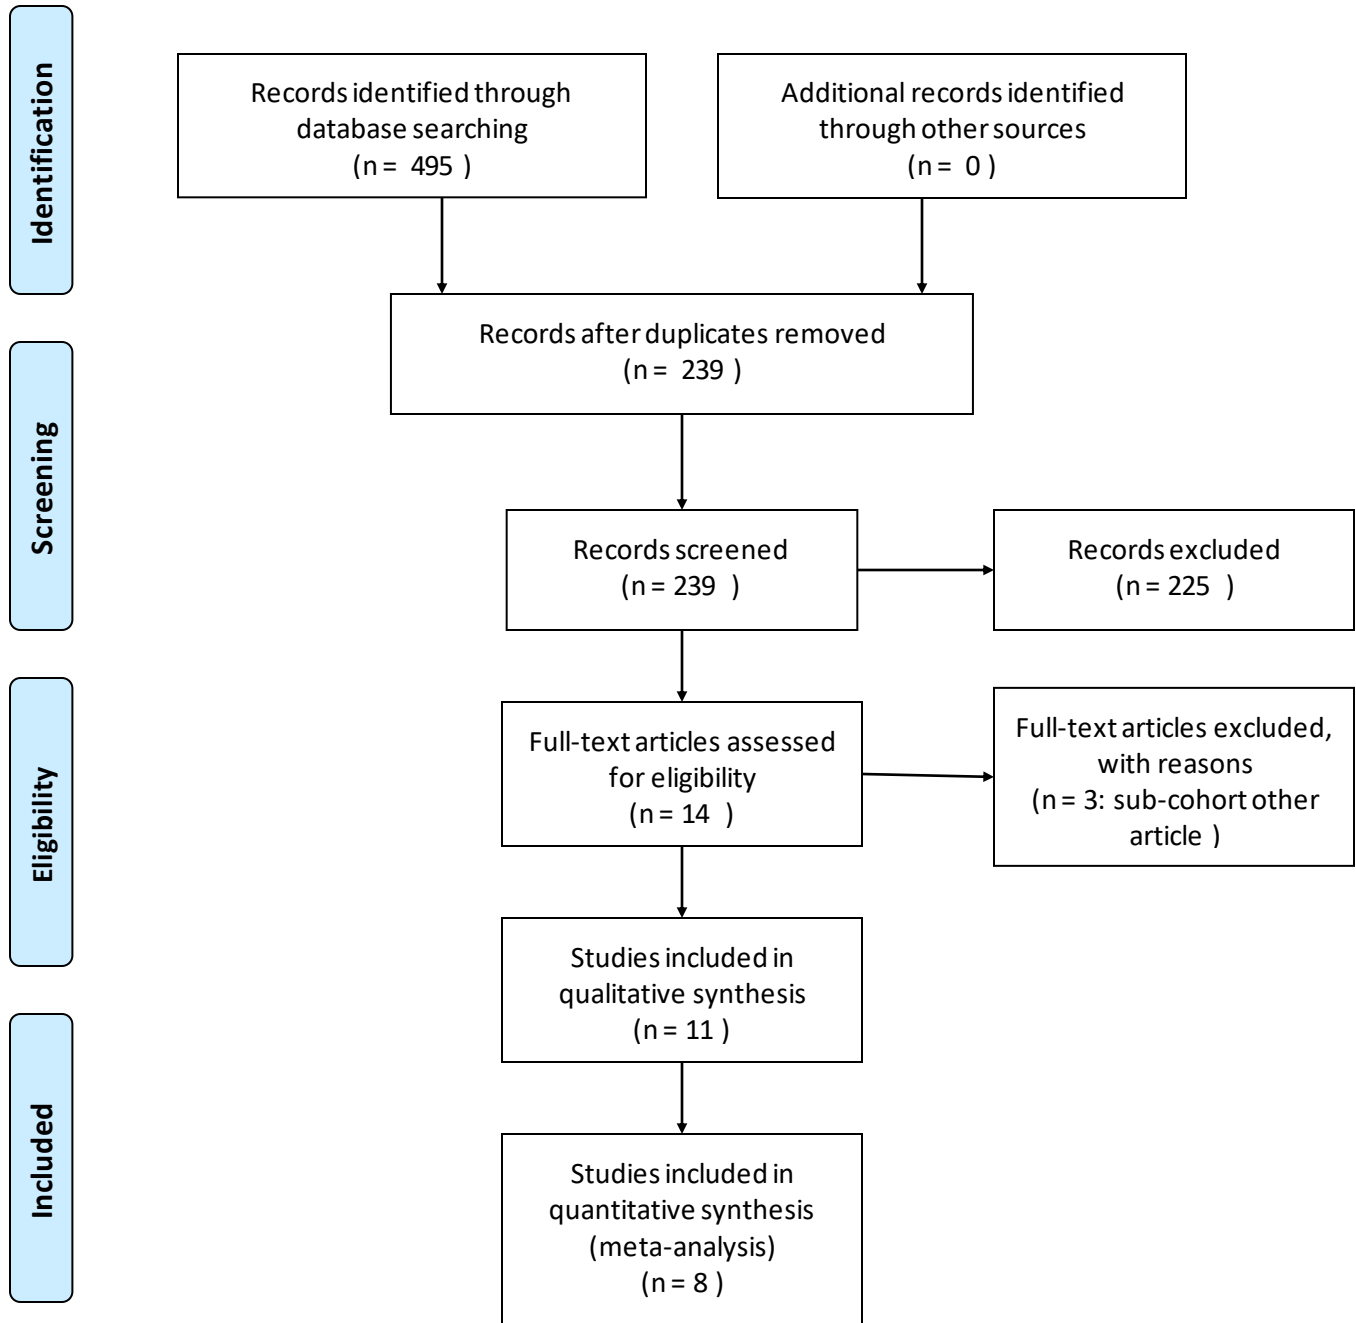

From: Moher D, Liberati A, Tetzlaff J, Altman DG, The PRISMA Group (2009). Preferred Reporting Items for Systematic Reviews and Meta-Analyses: The PRISMA Statement. PLoS Med 6(7): e1000097. doi:10.1371/journal.pmed1000097

For more information, visit [www.prisma-statement.org](http://www.prisma-statement.org).
